# Supplementary material
Source: PubMed Central journal article supplement (PMC3818066)
Supplement: NIHMS512621-supplement-Supporting_Information.pdf [file NIHMS512621-supplement-Supporting_Information.pdf]

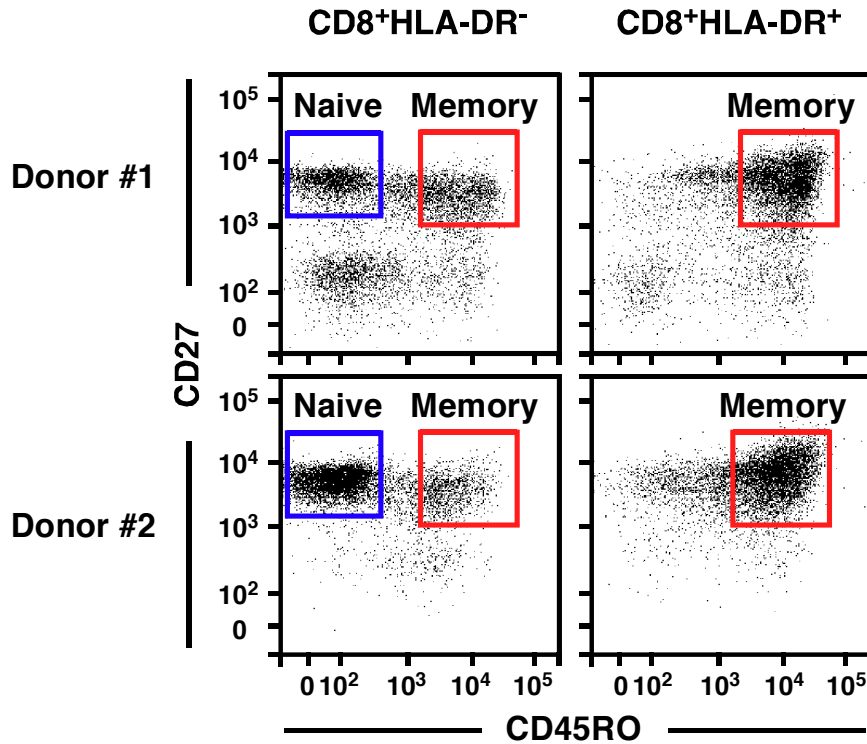

### Supporting Information Fig.1

Distribution of naive and memory phenotypes within CD8<sup>+</sup>HLA-DR<sup>-</sup> and CD8<sup>+</sup>HLA-DR<sup>+</sup> T cells. Naive cells are defined as CD45RO<sup>-</sup>CD27<sup>+</sup>; and memory cells are defined as CD45RO<sup>+</sup>CD27<sup>+</sup>, as indicated in the plots. Two different patterns representing the donor from 10 healthy controls are shown.

### Enriched CD8+ T cells

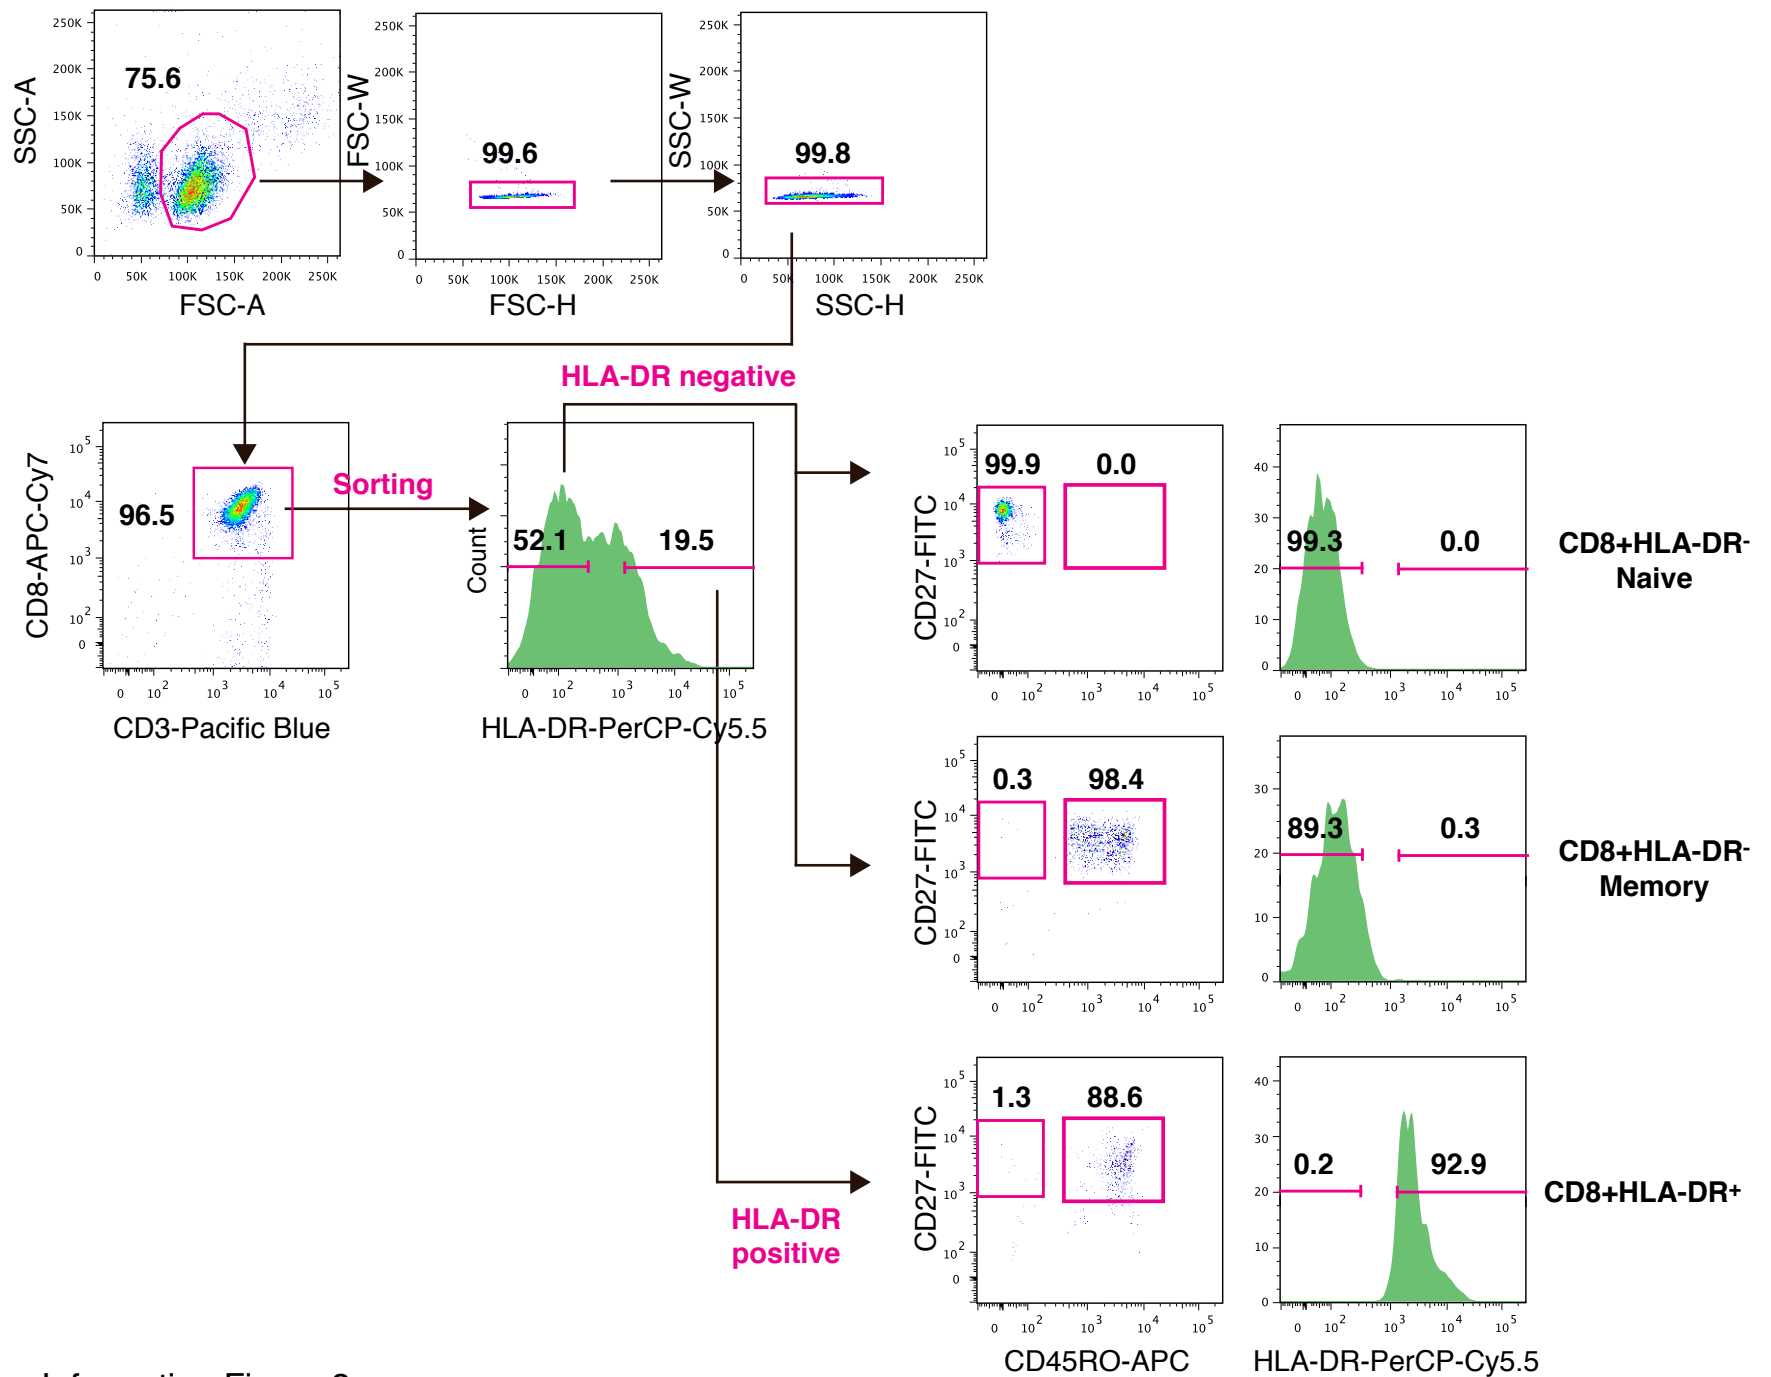

Supporting Information Figure 2

Gating strategy used for FACS sorting of CD8+HLA-DR- naive, CD8+HLA-DR- memory and CD8+HLA-DR+ subsets for studies depicted in Figures 4, 7 and 8.

**A**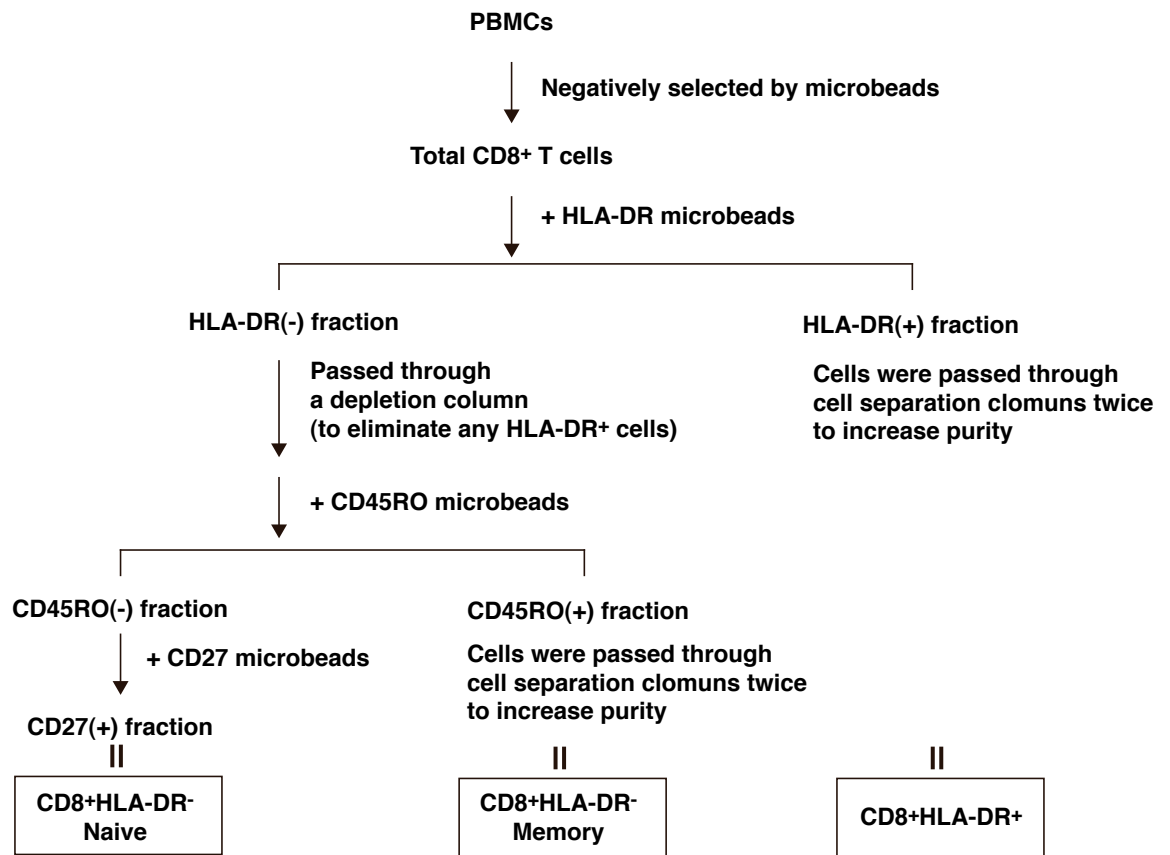**B**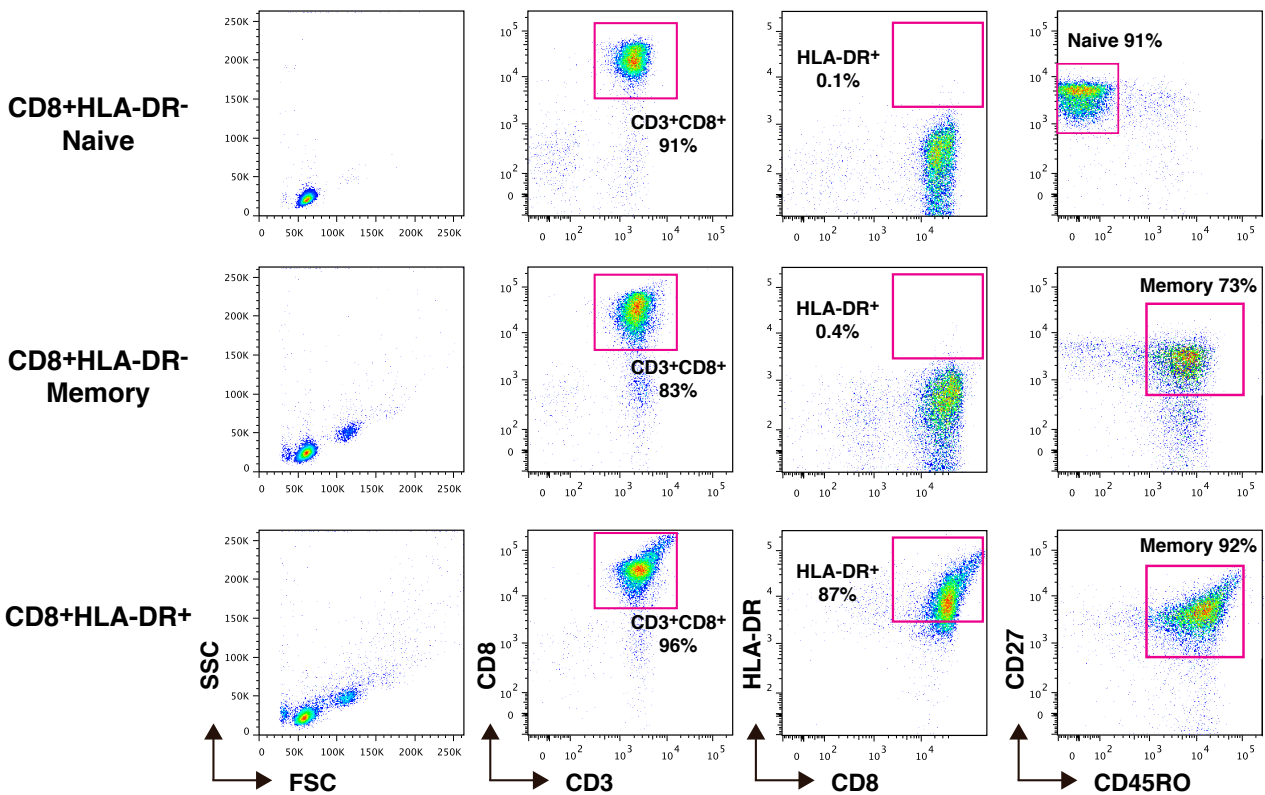

### Supporting Information Figure 3

Purification of CD8+HLA-DR<sup>-</sup> naive, CD8+HLA-DR<sup>-</sup> memory and CD8+HLA-DR<sup>+</sup> T cell subsets by magnetic microbeads. (A) A schematic diagram depicting the strategy used to obtain pure populations of CD8+HLA-DR<sup>-</sup> naive, CD8+HLA-DR<sup>-</sup> memory and CD8+HLA-DR<sup>+</sup> T cells from PBMCs by magnetic beads. (B) The purity of the cells was assessed following separation by staining the cells with anti-CD3, CD8, HLA-DR, CD45RO and CD27 antibodies by flow cytometry.

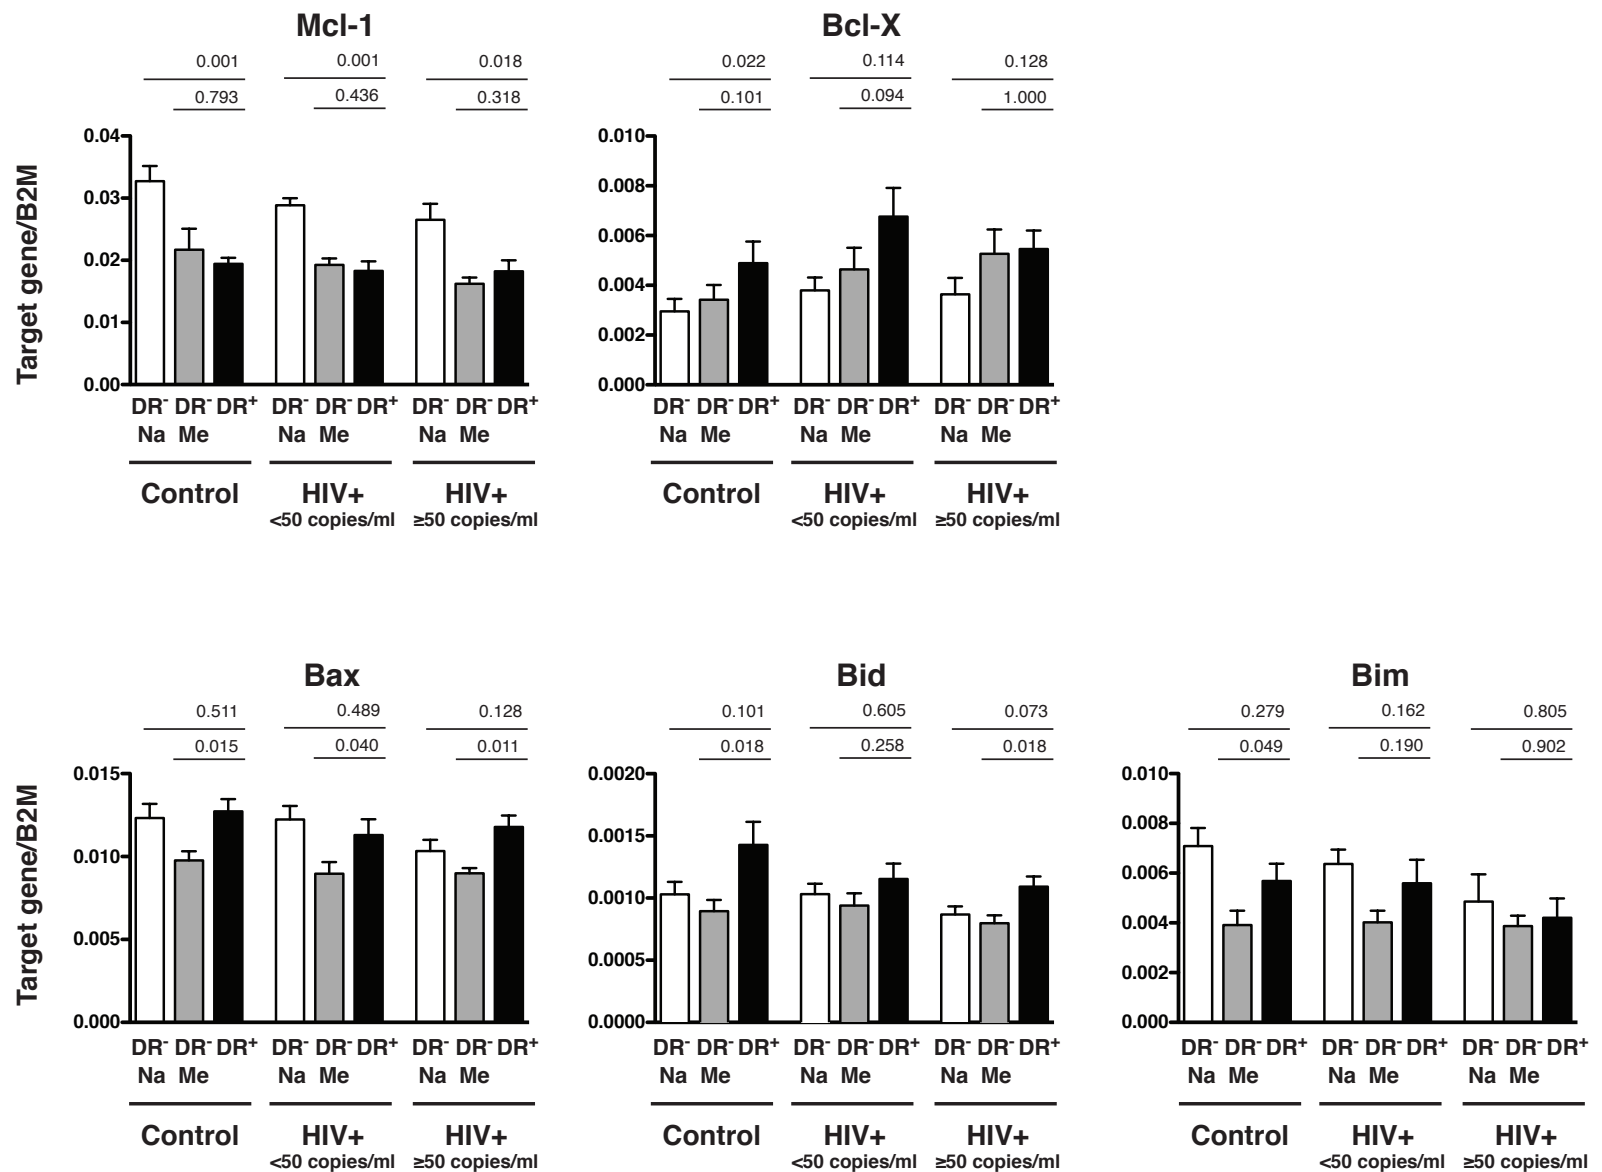

## Supporting Information Figure 4

Expression levels of anti-apoptotic (Mcl-1, Bcl-X) and pro-apoptotic (Bax, Bid and Bim) genes. Mean±SEM values were calculated from FACS-sorted CD8<sup>+</sup>HLA-DR<sup>-</sup> naive, CD8<sup>+</sup>HLA-DR<sup>-</sup> memory and CD8<sup>+</sup>HLA-DR<sup>+</sup> T cells from control (n=11), HIV+ <50 (n=9) and HIV+ ≥50 (n=7) individuals. DR<sup>-</sup> and DR<sup>+</sup> stand for HLA-DR negative and HLA-DR positive cells, respectively. Na and Me stand for naive and memory cells, respectively. The level of statistical significance was determined by the Mann-Whitney nonparametric test.

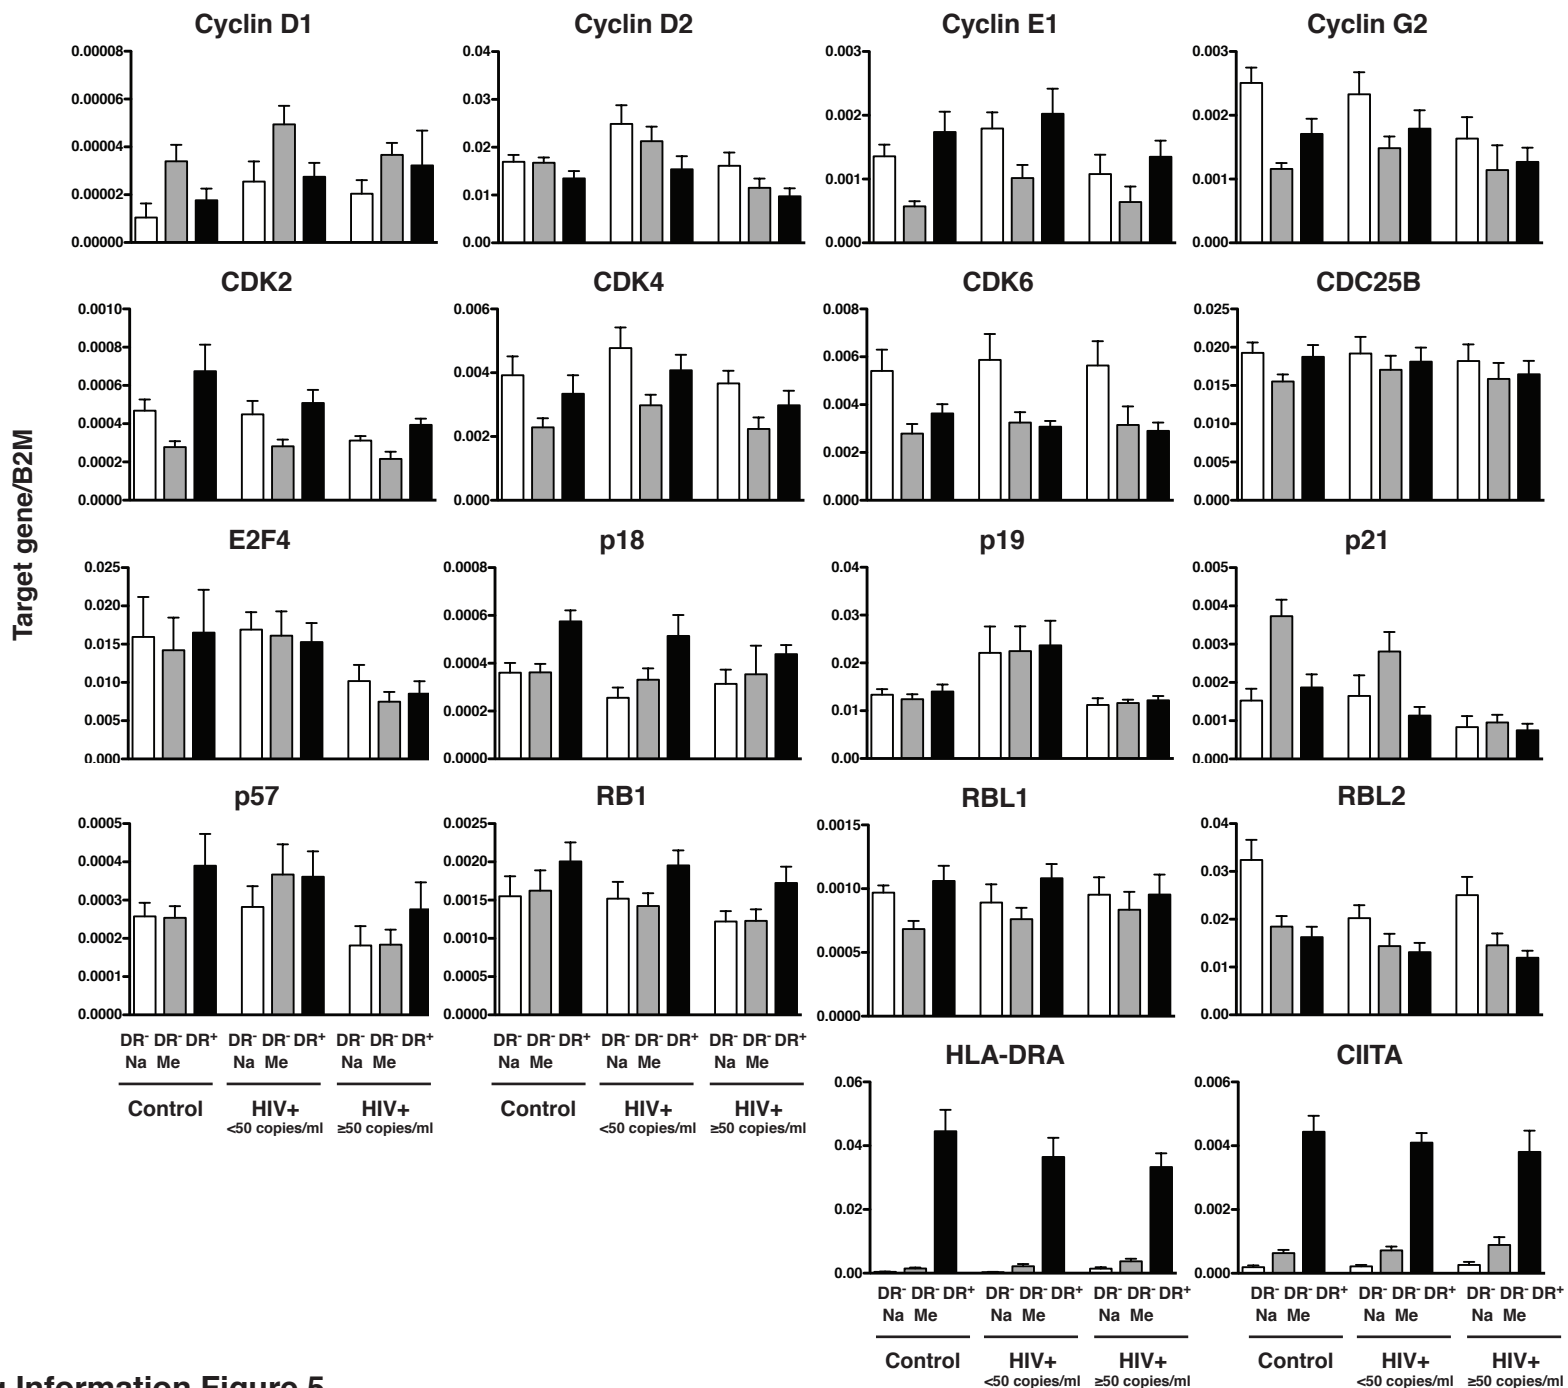

## Supporting Information Figure 5

Expression of additional 16 genes involved in cell cycle and signature (HLA-DR and CIITA) genes in FACS-sorted CD8<sup>+</sup>HLA-DR<sup>-</sup> naive, CD8<sup>+</sup>HLA-DR<sup>-</sup> memory and CD8<sup>+</sup>HLA-DR<sup>+</sup> T cells. Mean±SEM values were calculated from control (n=9), HIV+ <50 (n=10) and HIV+ ≥50 (n=9) individuals. DR<sup>-</sup> and DR<sup>+</sup> stand for HLA-DR negative and HLA-DR positive cells, respectively. Na and Me stand for naive and memory cells, respectively. Expression of cyclin A1 and p16 INK4b was not detected with 40 cycles of PCR amplification.

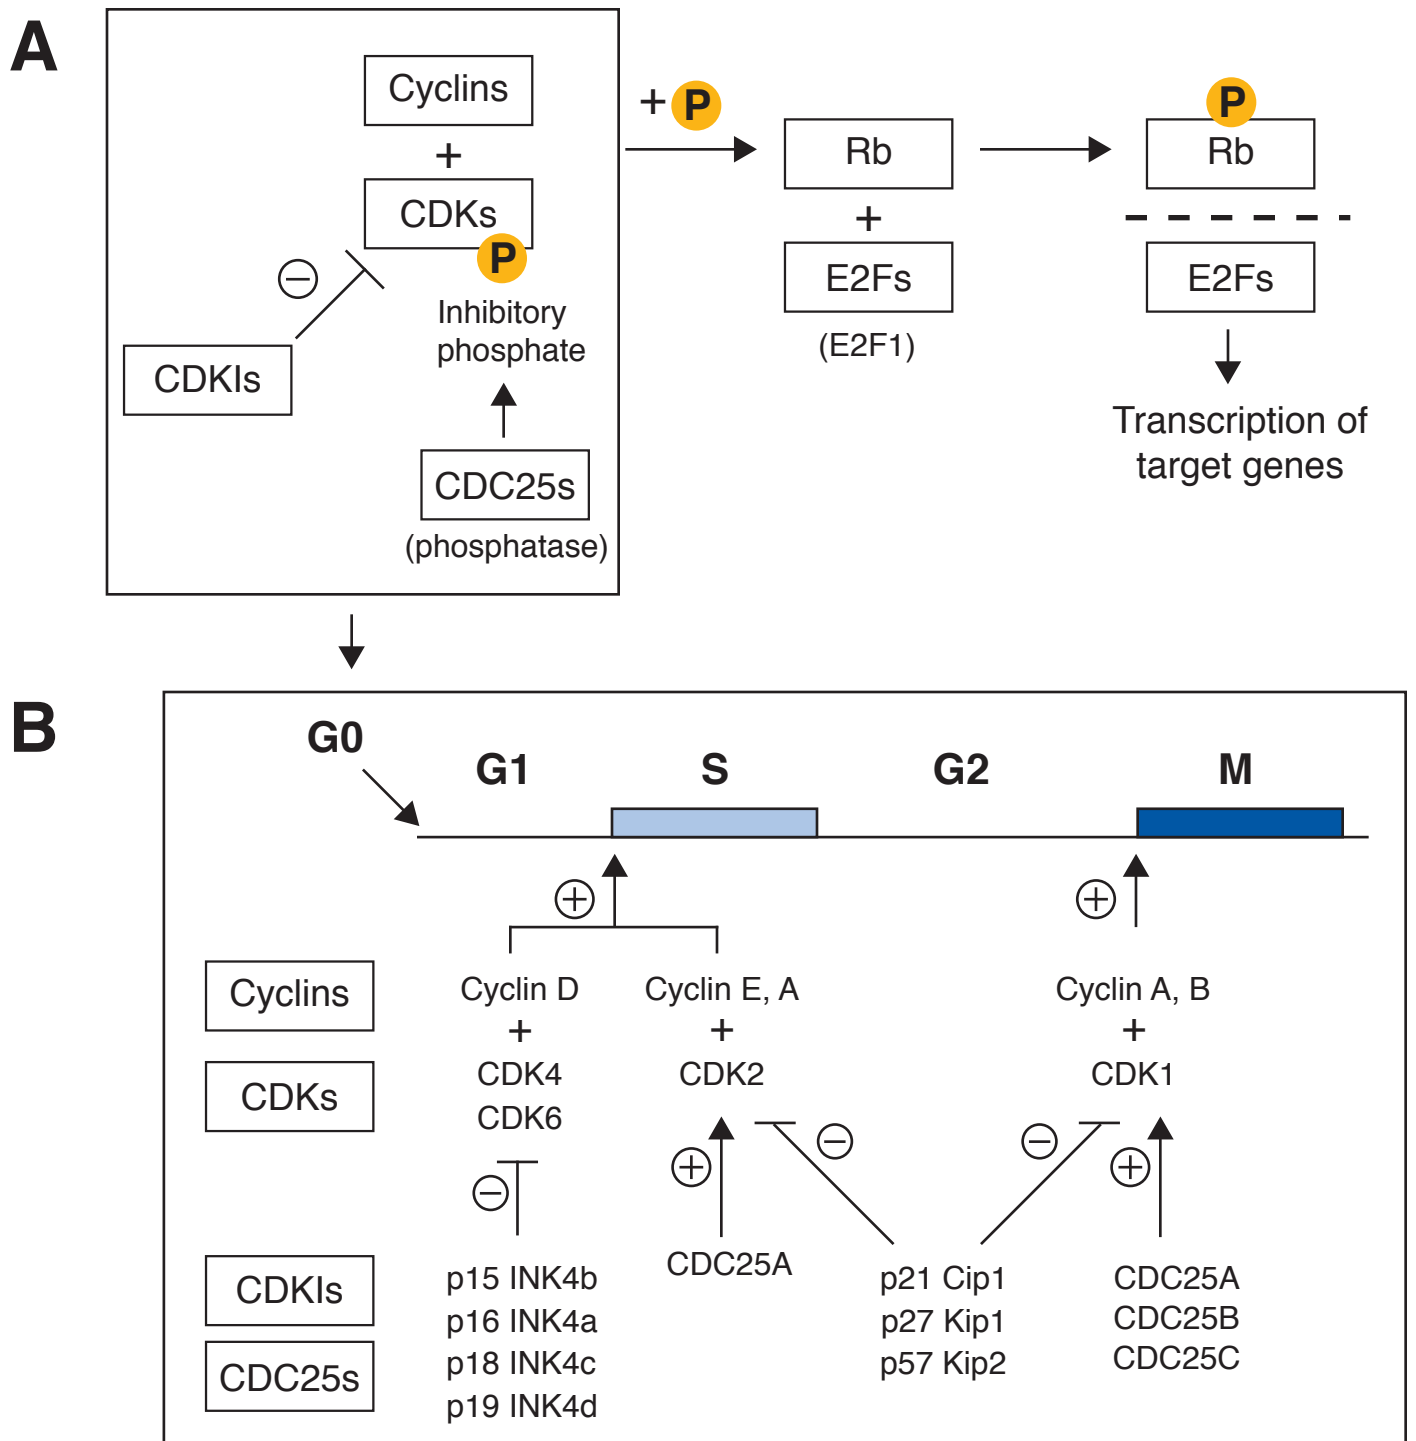

**Supporting Information Figure 6.**  
**Schematic diagram of control of cell cycle progression.**

**A**, Entry of quiescent (G0) cells into G1 phase of cell cycle involves induction of a number of cell cycle activators, including D-type cyclins and cyclin-dependent kinases (CDKs) 4/6. Activation of cyclin D-CDK4/6, in conjunction with subsequent activation of cyclin E-CDK2, results in phosphorylation of members of the retinoblastoma protein family (Rb). Hyperphosphorylated Rb dissociates from the E2F transcription factor family members (E2Fs), allowing the transcription of several genes required progression through G1 phase of the cell cycle. **B**, Mammalian CDKs are negatively regulated by CDK inhibitors. Members of the INK4 family (p16 INK4a, p15 INK4b, p18 INK4c, and p19 INK4d) specifically inactivate CDK4 and CDK6, whereas members of the CIP/KIP family (p21 CIP1, p27 KIP1, and p57 KIP2) inhibit activity of all CDKs by forming a ternary complex with cyclin-CDK. A family of dual-specificity phosphatases, CDC25s, activates both CDK1 and CDK2 by dephosphorylating inhibitory phosphates: Tyr15 and Thr14. Among the three known isoforms: CDC25A, B and C, CDC25A promotes entry into S phase by acting on cyclinE-CDK2 and cyclin A-CDK2, whereas CDC25B and CDC25C play a role in the onset of mitosis.

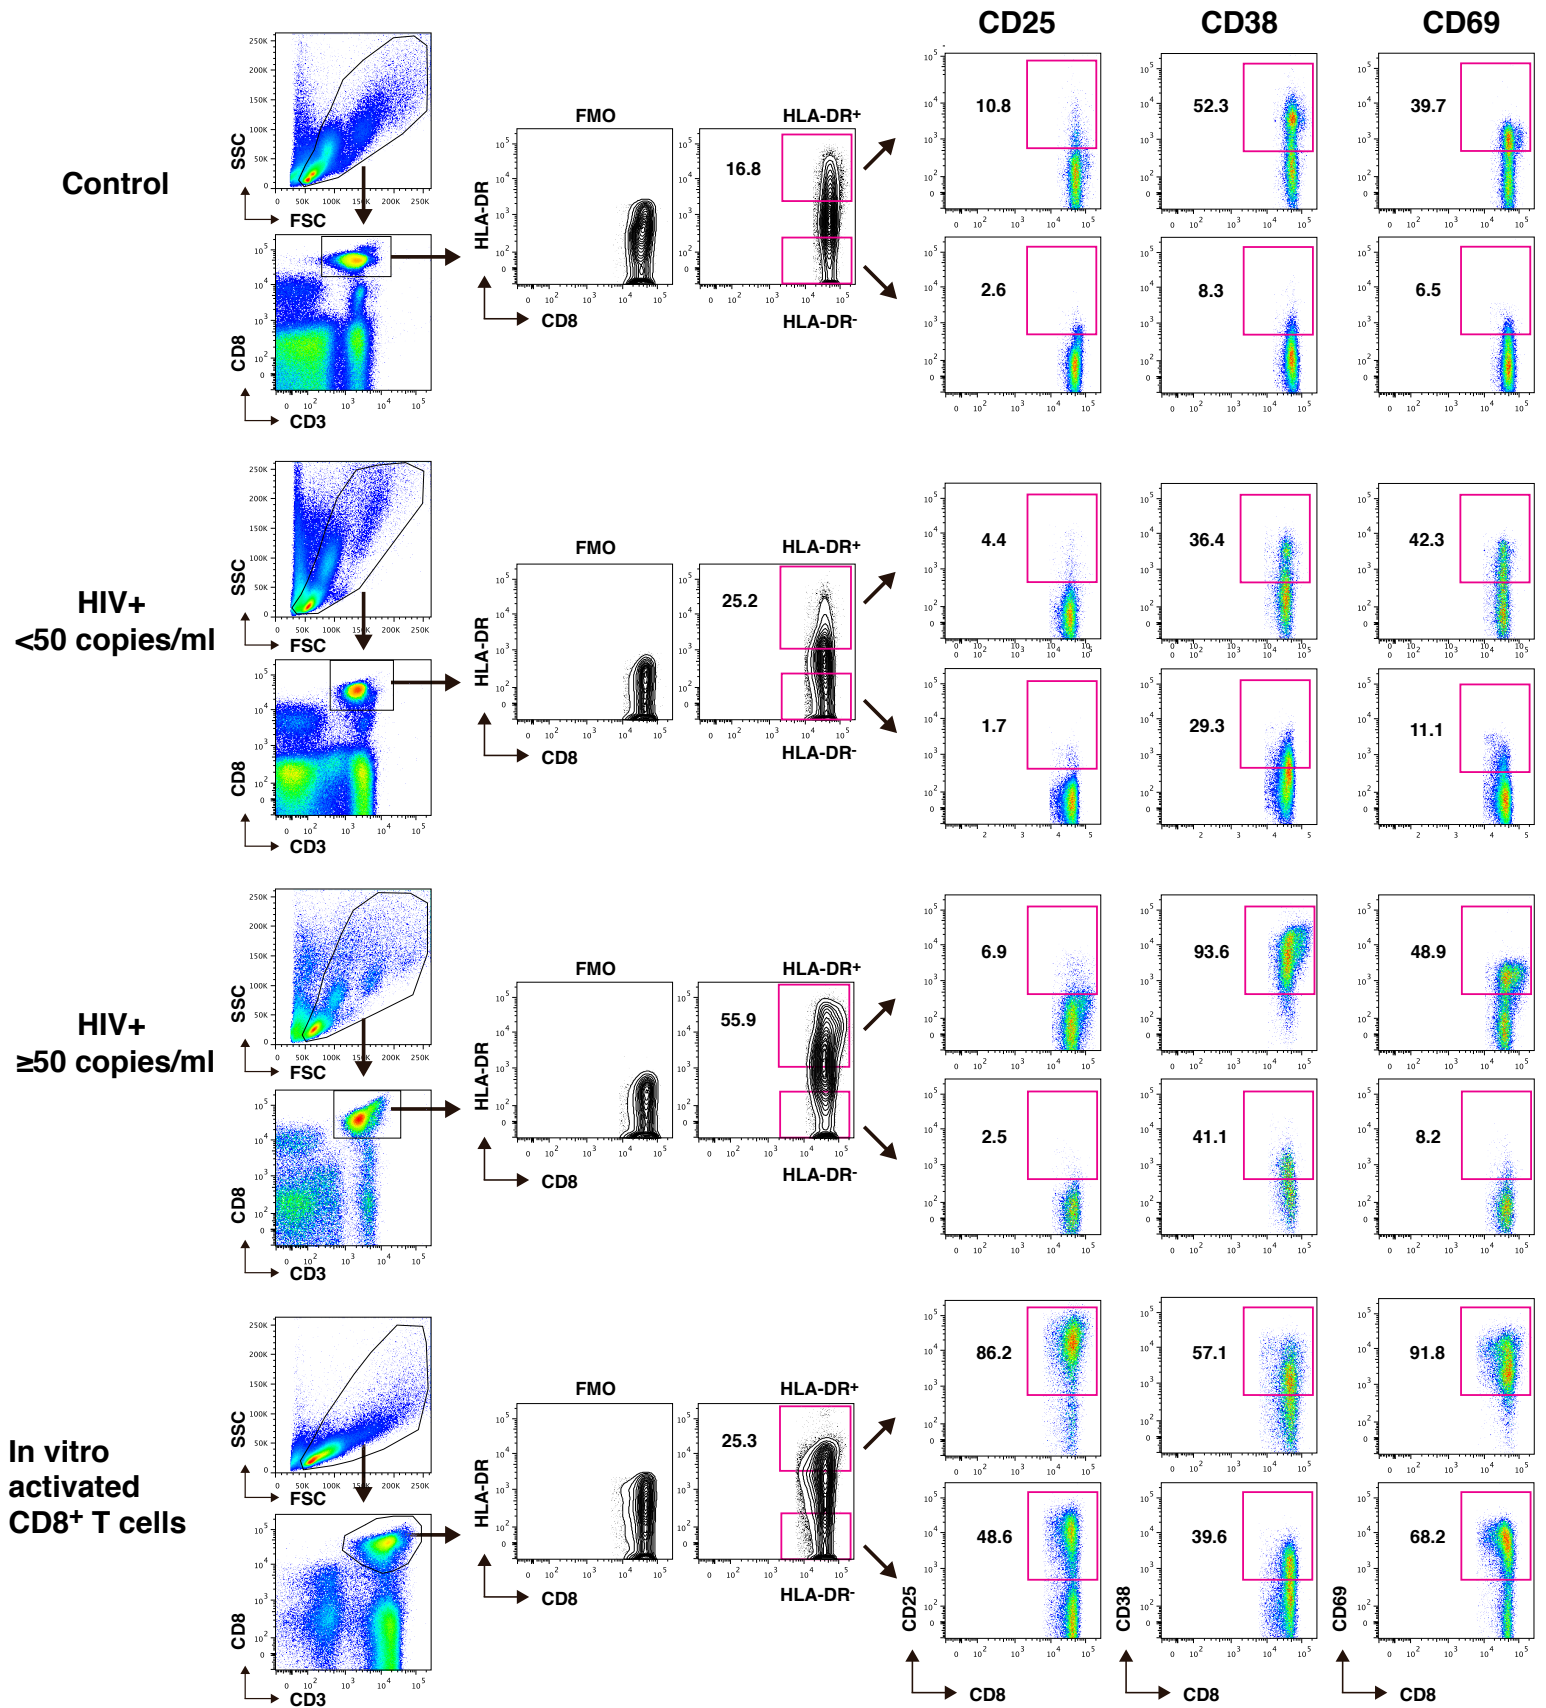

### Supporting Information Figure 7

Representative plots of cell surface expression of CD25, CD38 and CD69 on CD8+HLA-DR- and CD8+HLA-DR+ T cells from control (n=14), HIV+ <50 copies/ml (n=17), HIV+ ≥50 copies/ml (n=9) individuals and in vitro activated CD8+ T cells (n=3).

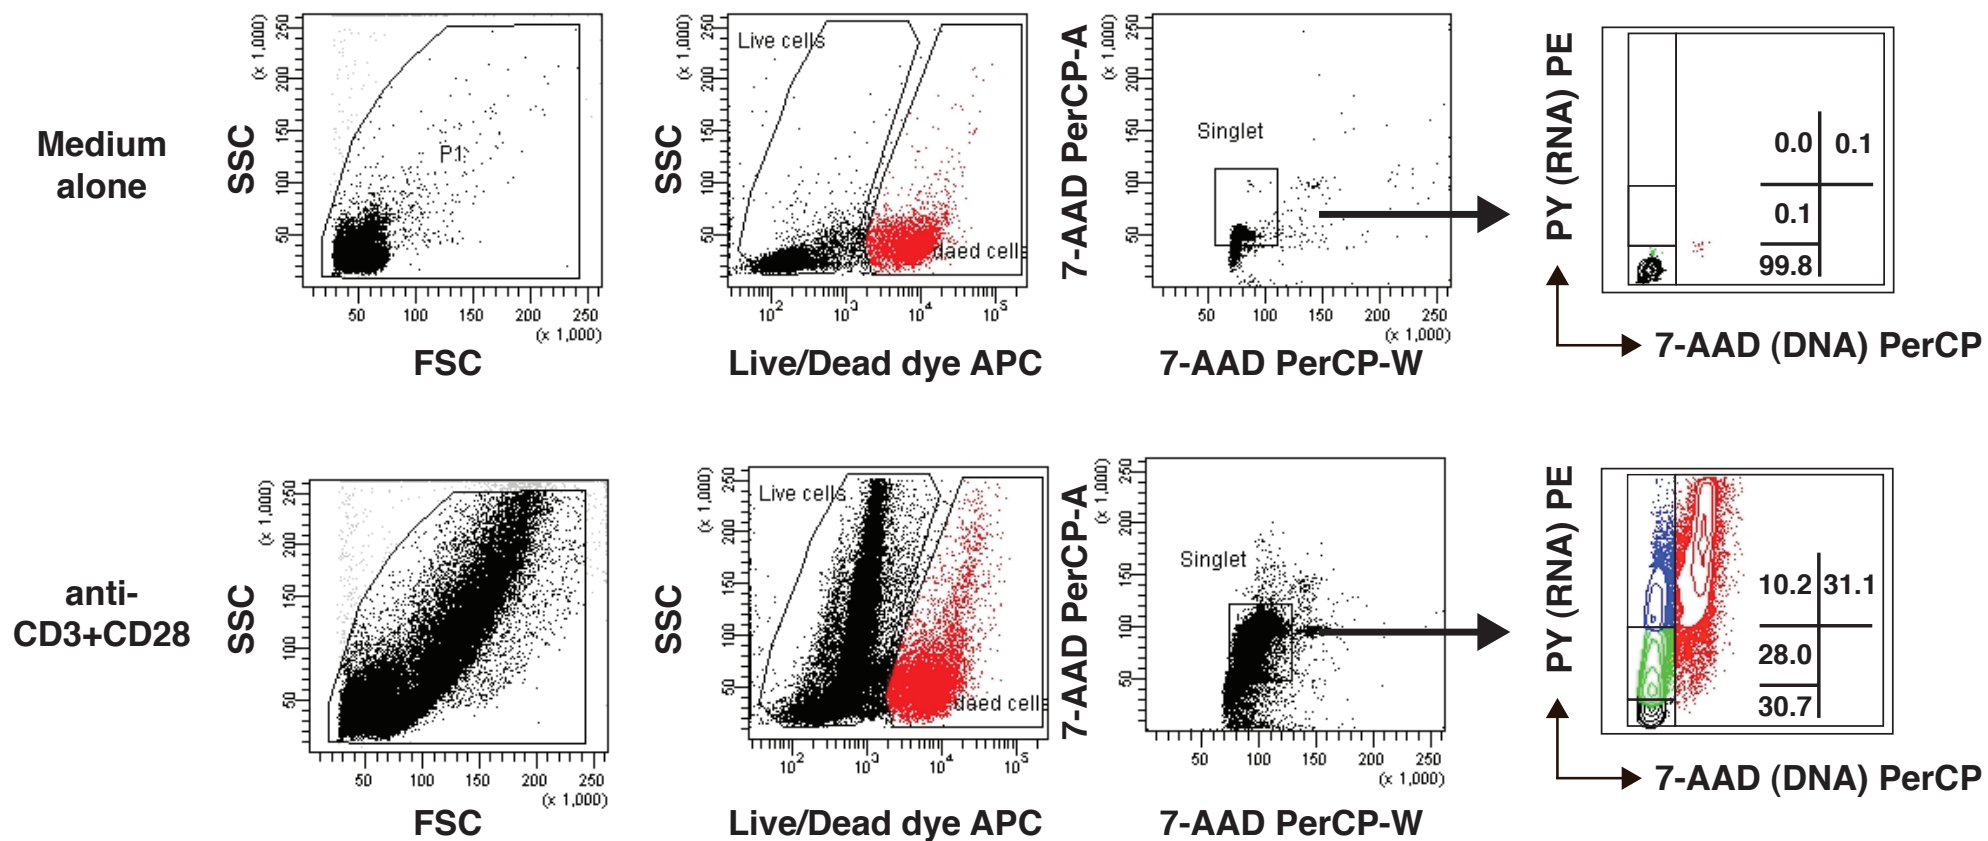

### Supporting Information Figure 8

Gating strategy used to analyze cell cycle status by 3-color flow cytometry. Plots are one representative set from CD8<sup>+</sup>HLA-DR<sup>-</sup> naive cells that were cultured with medium alone or anti-CD3+CD28 for 2 days. The data are from the same HIV-infected individual (HIV-RNA <50 copies/ml) used for the analysis shown in Figure 6.



**Supporting Information Table 1.** TaqMan Primer/Probe sets used in the study.

|     |         |               |           |
|-----|---------|---------------|-----------|
| 1.  | B2M     | Hs99999907_m1 |           |
| 2.  | CCNA1   | Hs00171105_m1 | cyclin A1 |
| 3.  | CCNA2   | Hs00153138_m1 | cyclin A2 |
| 4.  | CCND1   | Hs00277039_m1 | cyclin D1 |
| 5.  | CCND2   | Hs00277041_m1 | cyclin D2 |
| 6.  | CCND3   | Hs00426901_m1 | cyclin D3 |
| 7.  | CCNE1   | Hs00233356_m1 | cyclin E1 |
| 8.  | CCNB1   | Hs00259126_m1 | cyclin B1 |
| 9.  | CCNG2   | Hs00171119_m1 | cyclin G2 |
| 10. | CDK1    | Hs00938778_m1 |           |
| 11. | CDK2    | Hs00608082_m1 |           |
| 12. | CDK4    | Hs00364847_m1 |           |
| 13. | CDK6    | Hs01026372_m1 |           |
| 14. | RB1     | Hs00153108_m1 |           |
| 15. | RBL1    | Hs00161234_m1 | Rb p107   |
| 16. | RBL2    | Hs00180562_m1 | Rb p130   |
| 17. | CDKN2B  | Hs00394703_m1 | p15 INK4b |
| 18. | CDKN2A  | Hs00233365_m1 | p16 INK4a |
| 19. | CDKN2C  | Hs00176227_m1 | p18 INK4c |
| 20. | CDKN2D  | Hs00176481_m1 | p19 INK4d |
| 21. | CDKN1A  | Hs99999142_m1 | p21 Cip1  |
| 22. | CDKN1B  | Hs00153277_m1 | p27 Kip1  |
| 23. | CDKN1C  | Hs00175938_m1 | p57 Kip2  |
| 24. | CDC25A  | Hs00153168_m1 |           |
| 25. | CDC25B  | Hs00244740_m1 |           |
| 26. | CDC25C  | Hs00156411_m1 |           |
| 27. | E2F1    | Hs00153451_m1 |           |
| 28. | E2F4    | Hs00608098_m1 |           |
| 29. | CIITA   | Hs00172106_m1 |           |
| 30. | HLA-DRA | Hs00219578_m1 |           |
| 31. | CDC6    | Hs00154374_m1 |           |
| 32. | CDT1    | Hs00417193_g1 |           |
| 33. | BAX     | Hs01016552_g1 | Bax       |
| 34. | BID     | Hs00609632_m1 | Bid       |
| 35. | BIM     | Hs00708019_m1 | BCL2L11   |
| 36. | BCL2    | Hs00153350_m1 | Bcl-2     |
| 37. | MCL1    | Hs00172036_m1 | Mcl-1     |
| 38. | BIRC5   | Hs00153353_m1 | Survivin  |

Beta-2 microglobullin (*B2M*) was used for normalization

**Supporting Information Table 2.** Antibodies used in the western blot.

1. Cyclin D3 (2936; Cell Signaling)
2. Cyclin A (05-374; Millipore)
3. Cyclin B1 (05-373; Millipore)
4. Cdc2 (CDK1) (06-923; Millipore),
5. p16 INK4a (sc-467; Santa Cruz),
6. p27 Kip1 (06-445; Millipore)
7. CDC25A (05-743; Millipore)
8. CDC25C (05-507; Millipore)
9. E2F1 (05-379; Millipore)
10. Cdc6 (sc-9964; Santa Cruz)
11. CDT1 (TA305481; Origene)
12. Bcl-2 (2872; Cell Signaling)
13. Survivn (2802; Cell Signaling)
14. beta-Actin (ab8226; Abcam) for the assessment of loading equivalency of whole cell lysate
15. TFII-I antibody (4562; Cell Signaling) for the assessment of loading equivalency of nuclear extract.
